# Supplementary material
Source: Springer Nature journal article supplement (https://www.springermedizin.de/resource/supplementary/12885_2010_2283_MOESM1_ESM.pdf/9460930)
Supplement: MOESM1 [file 9460930]

160,725 individuals were invited to participate

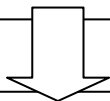

57,053 individuals accepted the invitation

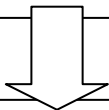

405 (184 women and 221 men) cases of colorectal cancer were diagnosed among the cohort members from 1994 to 2003

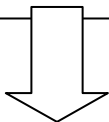

All information was available (blood samples, genotypes, life-style factors) for 378 cases.

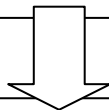

A sub-cohort sample of 368 women and 442 men were randomly selected from the cohort

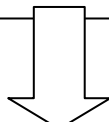

All information was available (blood samples, genotypes, life-style factors) for 756 sub-cohort members
